# Supplementary material for: Effective-compound combination of Bufei Yishen formula III combined with ER suppress airway mucus hypersecretion in COPD rats: via EGFR/MAPK signaling
Source: PubMed Central journal article supplement (PMC10643050; doi:10.1042/bsr20222669), 2023-11-10
Supplement: BSR-2022-2669_supp.pdf [file BSR-2022-2669_supp.pdf]

Supplementary material 3: The diagram of rats running on the experimental treadmill.

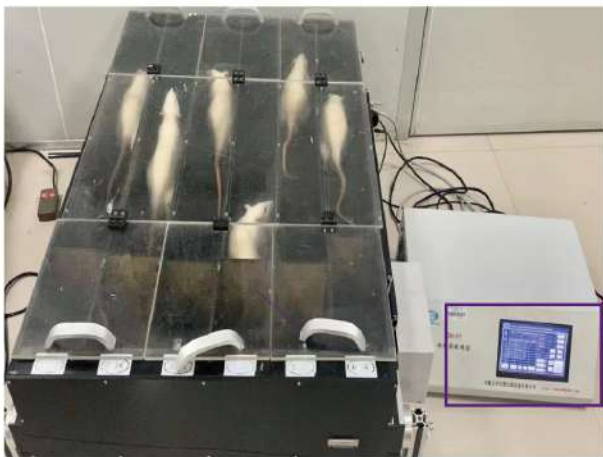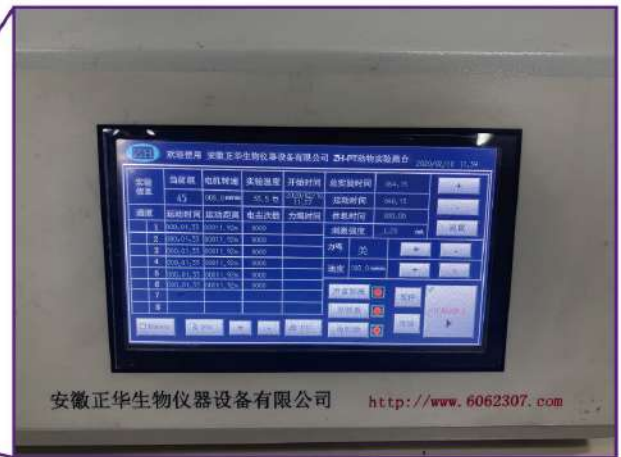

Supplementary material 1. Determine the speed of exercise

| Speed   | Status of rats                                  | Evaluation |
|---------|-------------------------------------------------|------------|
| 6m/min  | Stuck at the end of the conveyor belt           | infeasible |
| 8m/min  | Go at a canter                                  | feasible   |
| 10m/min | Moving too fast and will causing injury in rats | infeasible |

Supplementary material 2. Determine the time of exercise

---

| Time  | Group A                            | Group B                            | Group C                                         | Evaluation |
|-------|------------------------------------|------------------------------------|-------------------------------------------------|------------|
| 10min | The rats were in<br>good condition | -                                  | -                                               | feasible   |
| 20min | -                                  | The rats were in<br>good condition | -                                               | feasible   |
| 30min | -                                  | -                                  | The rats had poor spirit<br>and little activity | infeasible |

---
